# Supplementary material for: Prolonged versus standard native E. coli asparaginase therapy in childhood acute lymphoblastic leukemia and non-Hodgkin lymphoma: final results of the EORTC-CLG randomized phase III trial 58951
Source: PubMed Central journal article supplement — Haematologica. 2017 Jul 27;102(10):1727–38. doi: 10.3324/haematol.2017.165845 (PMC5622857; doi:10.3324/haematol.2017.165845), 2017-10

## Prolonged versus standard native *E. coli* asparaginase therapy in childhood acute lymphoblastic leukemia and non-Hodgkin lymphoma: final results of the EORTC-CLG randomized phase III trial 58951

Veerle Mondelaers,<sup>1</sup> Stefan Suciu,<sup>2</sup> Barbara De Moerloose,<sup>1</sup> Alina Ferster,<sup>3</sup> Françoise Mazingue,<sup>4</sup> Geneviève Plat,<sup>5</sup> Karima Yakouben,<sup>6</sup> Anne Uyttebroeck,<sup>7</sup> Patrick Lutz,<sup>8</sup> Vitor Costa,<sup>9</sup> Nicolas Sirvent,<sup>10</sup> Emmanuel Plouvier,<sup>11</sup> Martine Munzer,<sup>12</sup> Maryline Poirée,<sup>13</sup> Odile Minckes,<sup>14</sup> Frédéric Millot,<sup>15</sup> Dominique Plantaz,<sup>16</sup> Philip Maes,<sup>17</sup> Claire Hoyoux,<sup>18</sup> Hélène Cavé,<sup>19,20</sup> Pierre Rohrlach,<sup>13</sup> Yves Bertrand<sup>21</sup> and Yves Benoit<sup>1</sup> for the Children's Leukemia Group (CLG) of the European Organization for Research and Treatment of Cancer (EORTC)

<sup>1</sup>Department of Pediatric Hematology-Oncology and Stem Cell Transplantation, Ghent University Hospital, Ghent University, Belgium; <sup>2</sup>EORTC Headquarters, Brussels, Belgium; <sup>3</sup>Department of Pediatric Hematology-Oncology, Children's University Hospital Queen Fabiola, Université Libre de Bruxelles (ULB), Belgium; <sup>4</sup>Department of Pediatric Hematology-Oncology, CHRU, Lille, France; <sup>5</sup>Department of Pediatric Hematology-Oncology, CHU-Hopital Purpan, Toulouse, France; <sup>6</sup>Department of Pediatric Hematology, Robert Debré Hospital, AP-HP, Paris, France; <sup>7</sup>Department of Pediatric Hematology-Oncology, University Hospital Gasthuisberg, Leuven, Belgium; <sup>8</sup>Department of Pediatric Hematology-Oncology, University Hospital Hautepierre, Strasbourg, France; <sup>9</sup>Department of Pediatrics, Portuguese Oncology Institute, Porto, Portugal; <sup>10</sup>Department of Pediatric Hematology-Oncology, CHU, Montpellier, France; <sup>11</sup>Pediatric Hematology Unit, CHU Jean Minjot Hospital, Besançon, France; <sup>12</sup>Department of Pediatric Hematology-Oncology, American Memorial Hospital, Reims, France; <sup>13</sup>Department of Pediatric Hematology-Oncology, CHU Lenval, Nice, France; <sup>14</sup>Department of Pediatric Hematology-Oncology, CHU, Caen, France; <sup>15</sup>Pediatric Oncology Unit, University Hospital, Poitiers, France; <sup>16</sup>Department of Pediatric Oncology, University Hospital, Grenoble, France; <sup>17</sup>Department of Pediatrics, University Hospital Antwerp, Belgium; <sup>18</sup>Department of Pediatrics, CHR de la Citadelle, Liège, Belgium; <sup>19</sup>Department of Genetics, Assistance Publique des Hôpitaux de Paris (AP-HP), Robert Debré Hospital, Paris, France; <sup>20</sup>INSERM UMR 1131, University Institute of Hematology, University Paris Diderot, Paris Sorbonne Cité, France and <sup>21</sup>Institute of Pediatric Hematology and Oncology (IHOP), Hospices Civils de Lyon, and University Lyon 1, France

©2017 Ferrata Storti Foundation. This is an open-access paper. doi:10.3324/haematol.2017.165845

Received: February 6, 2017.

Accepted: July 21, 2017.

Pre-published: July 27, 2017.

Correspondence: veerle.mondelaers@uzgent.be

# **Prolonged versus standard native *E.coli* asparaginase therapy in childhood acute lymphoblastic leukemia and non-Hodgkin lymphoma: final results of the EORTC-CLG randomized phase III trial 58951**

Veerle Mondelaers<sup>1</sup>, Stefan Suci<sup>2</sup>, Barbara De Moerloose<sup>1</sup>, Alina Ferster<sup>3</sup>, Françoise Mazingue<sup>4</sup>, Geneviève Plat<sup>5</sup>, Karima Yakouben<sup>6</sup>, Anne Uyttebroeck<sup>7</sup>, Patrick Lutz<sup>8</sup>, Vitor Costa<sup>9</sup>, Nicolas Sirvent<sup>10</sup>, Emmanuel Plouvier<sup>11</sup>, Martine Munzer<sup>12</sup>, Maryline Poirée<sup>13</sup>, Odile Minckes<sup>14</sup>, Frédéric Millot<sup>15</sup>, Dominique Plantaz<sup>16</sup>, Philip Maes<sup>17</sup>, Claire Hoyoux<sup>18</sup>, Hélène Cavé<sup>19,20</sup>, Pierre Rohrlach<sup>13</sup>, Yves Bertrand<sup>21</sup> and Yves Benoit<sup>1</sup> for the Children's Leukemia Group (CLG) of the European Organization for Research and Treatment of Cancer (EORTC)

1 Department of Pediatric Hematology-Oncology and Stem Cell Transplantation, Ghent University Hospital, Ghent University, Ghent, Belgium

2 EORTC Headquarters, Brussels, Belgium

3 Department of Pediatric Hematology-Oncology, Children's University Hospital Queen Fabiola, Université Libre de Bruxelles (ULB), Brussels, Belgium

4 Department of Pediatric Hematology-Oncology, CHRU, Lille, France

5 Department of Pediatric Hematology-Oncology, CHU-Hopital Purpan, Toulouse, France

6 Department of Pediatric Hematology, Robert Debré Hospital, AP-HP, Paris, France

7 Department of Pediatric Hematology-Oncology, University Hospital Gasthuisberg, Leuven, Belgium

8 Department of Pediatric Hematology-Oncology, University Hospital Hautepierre, Strasbourg, France

9 Department of Pediatrics, Portuguese Oncology Institute, Porto, Portugal

10 Department of Pediatric Hematology-Oncology, CHU, Montpellier, France

11 Pediatric Hematology Unit, CHU Jean Minjoz Hospital, Besançon, France

12 Department of Pediatric Hematology-Oncology, American Memorial Hospital, Reims, France

13 Department of Pediatric Hematology-Oncology, CHU Lenval, Nice, France

- 14 Department of Pediatric Hematology-Oncology, CHU, Caen, France
- 15 Pediatric Oncology Unit, University Hospital, Poitiers, France
- 16 Department of Pediatric Oncology, University Hospital, Grenoble, France
- 17 Department of Pediatrics, University Hospital Antwerp, Antwerp, Belgium
- 18 Department of Pediatrics, CHR de la Citadelle, Liège, Belgium
- 19 Department of Genetics, Assistance Publique des Hôpitaux de Paris (AP-HP), Robert Debré Hospital, Paris, France
- 20 INSERM UMR 1131, University Institute of Hematology, University Paris Diderot, Paris Sorbonne Cité, Paris, France
- 21 Institute of Pediatric Hematology and Oncology (IHOP), Hospices Civils de Lyon, and University Lyon 1, Lyon, France

**Corresponding author:**

Veerle MONDELAERS

Department of Pediatric Hematology-Oncology and Stem Cell Transplantation,  
Ghent University Hospital,  
185 De Pintelaan (3K12D),  
B-9000 Ghent, BELGIUM.

Tel: ++32-9-3326463, Fax: ++32-9-3323875

e-mail: [veerle.mondelaers@uzgent.be](mailto:veerle.mondelaers@uzgent.be)

**Participating institutions and investigators/biologists of the EORTC-CLG to this study**

**Definitions**

**Risk groups**

**CNS disease**

**Remission and relapse criteria**

**Statistical Analysis**

**Supplemental tables**

**Supplemental figures**

**Participating institutions and investigators/biologists of the EORTC-CLG to this study**

**Belgium:** P. Maes, E. Michiels, *Antwerp*; J. Otten, J. vandeWerff-Ten Bosch, A. Van Damme, M. Bakkus, A. Ferster, P. Heimann, *Brussels*; Y. Benoit, B. De Moerloose C. Dhooge, G. Laureys, E. Vandecruys, V. Mondelaers, F. Speleman, J. Philippe, N. Van Roy, *Gent*; A. Uyttebroeck, M. Renard, *Leuven*; C. Hoyoux, M.-F. Dresse, *Liège*; P. Philippet, N. Francotte, *Montegnée*;

**France:** X. Rialland, *Angers*; P. Rohrlich, E. Plouvier, *Besançon*; P. Boutard, O. Minckes, *Caen*; D. Plantaz, *Grenoble*; B. Nelken, F. Mazingue, C. Preudhomme, M. Fournier, N. Grardel, *Lille*; Y. Bertrand, C. Domenech, S. Girard, M.P. Pagès, N. Philippe†, *Lyon*; G. Margueritte, *Montpellier*; F. Mechinaud, C. Thomas, *Nantes*; A. Thyss, C. Soler, A. Deville, N. Sirvent, M. Poirée, *Nice*; B. Lescoeur, K. Yakouben, E. Vilmer†, M. Duval, H. Cavé, *Paris*; F. Millot, *Poitiers*; M. Munzer, C. Behar, C. Dufour, *Reims*; P. Lutz, A. Babin-Boilletot, *Strasbourg*; A. Robert, G. Plat, N. Dastugue, E. Delabesse, *Toulouse*;

**Portugal:** S. Borges, L. Norton, N. Dos Reis Farinha, L. Cavadas, V. Costa, S. Borges, *Porto*.

## Definitions

### DIAGNOSIS

Diagnosis of ALL was based on the presence of more than 25% lymphoblasts in at least one bone marrow aspirate; NHL was defined as any neoplastic proliferation within the lymphoid cell lineage with less than 25% lymphoblasts in the bone marrow. Cytomorphology, immunophenotyping and cytogenetics on blood and/or bone marrow (BM) samples as well as on samples of extramedullary tissue were reviewed by a central reference panel.

### RISK GROUPS

Patients were assigned to different risk groups: very low risk (VLR), average risk (AR) and very high risk (VHR). The VLR group consisted of patients with progenitor B-cell ALL with white blood cell (WBC) counts below  $10 \times 10^9/L$ , hyperdiploid karyotype ( $>50$  chromosomes in at least 3 abnormal metaphases) and DNA index (DI)  $\geq 1.16$ . The presence of central nerve system (CNS) or gonadal involvement or the presence of VHR criteria excluded patients from the VLR group. VHR criteria consisted of blast count in peripheral blood  $\geq 1 \times 10^9/L$  at completion of the prephase (day 8), presence of t(9;22), t(4;11) or another MLL rearrangement, near-haploidy ( $< 34$  chromosomes), hypodiploidy (35-40 chromosomes), acute undifferentiated leukemia (AUL), minimal residual disease (MRD)  $\geq 10^{-2}$  at completion of induction (day 35) or failure to achieve complete remission (CR) or good partial response (GPR)<sup>8,14</sup>. The AR group was defined by the absence of VLR and VHR characteristics. AR patients were substratified in low average risk (AR1) and high average risk (AR2) groups. Patients belonged to the AR1 group if they had B-cell lineage ALL with WBC counts below  $100 \times 10^9/L$ , initial CNS-2 or hemorrhagic cerebrospinal fluid (CSF), and becoming negative at day 4 of prephase. AR2 criteria included B-cell lineage ALL with WBC counts above  $100 \times 10^9/L$  and T-cell lineage ALL. All patients with overt or non-equivocal CNS involvement at diagnosis or any CSF involvement at day 4, and all patients with gonadal involvement were allocated to the AR2 group.

### CNS DISEASE

CNS status was defined as CNS-1 (no blast cells in a sample of cerebrospinal fluid), CNS-2 ( $< 5$  WBC/mm<sup>3</sup> with blasts in a sample with ratio erythrocytes/leukocytes  $< 10$ ), CNS-3 ( $\geq 5$  WBCs/mm<sup>3</sup> with blasts in a sample with ratio erythrocytes/leukocytes  $< 10$ ),

and/or any neurological abnormality attributed to leukemic involvement), or traumatic lumbar puncture with blast cells (TLP+) ( $> 5$  WBC/mm<sup>3</sup> with blasts in a sample with ratio erythrocytes/leukocytes  $\geq 10$ ). All patients with CNS-3 status or any CNS involvement at the lumbar puncture 3 days after the initial one, and without any VHR criteria, were included in the AR2 group.

#### REMISSION AND RELAPSE CRITERIA

Complete remission (CR) was defined as disappearance of all symptoms related to the leukemia or lymphoma in combination with less than 5% blasts in a hematologically recovered bone marrow and in absence of blasts in the CSF. Good partial response (GPR) was defined, for NHL and T-cell ALL, by the disappearance of all signs of lymphoma or leukemia, except for a residual mass on one tumor site with a diameter less than 30% of the original diameter

#### **Statistical Analysis**

DFS was computed from date of randomization to date of relapse at any site, or death, or until date of last follow-up for children in continuous complete remission (censored observations). OS was calculated from date of initial randomization to date of death or date of last follow-up for children alive (censored observations).

Patients eligible for the EORTC-CLG 58951 trial were prospectively registered at diagnosis. At the end of induction, patients eligible for the ASNase question were randomly assigned at the EORTC Headquarters, Brussels. Central randomization was stratified by the 1st randomized arm, EORTC risk group and treating site using a minimization technique.

Survival distributions were estimated according to the Kaplan-Meier technique; standard errors (SE) of the estimates were obtained via the Greenwood formula. The two-sided, log-rank test was used for comparisons of treatment outcome. All *P*-values were from two-sided tests. For exploratory purposes, we investigated predictive importance of several factors on the treatment differences regarding the efficacy outcomes. The forest plot technique was used to display treatment differences regarding the outcomes. The estimated HR and its 95% or 99% confidence interval (CI), were derived from log-rank test computations. Heterogeneities between the HRs were tested for significance using the Cochran's Q test, used in meta-analyses<sup>16</sup>.

An intention-to-treat analysis was performed. The SAS 9.4 software (SAS Institute Inc, Cary, NC, USA) was used for data analysis.



**Suppl. table 1a: EORTC-CLG treatment protocol for very low risk patients**

| <b>Drug</b>                                                                                                                                                                                          | <b>Dose</b>                      | <b>Days of administration</b> |
|------------------------------------------------------------------------------------------------------------------------------------------------------------------------------------------------------|----------------------------------|-------------------------------|
| <b>Induction: protocol IA</b>                                                                                                                                                                        |                                  |                               |
| Methotrexate (IT)                                                                                                                                                                                    |                                  | 1 (prephase)                  |
| <b>According to randomization</b>                                                                                                                                                                    |                                  |                               |
| PRED (PO)                                                                                                                                                                                            | 60 mg/m <sup>2</sup>             | 1-7 (prephase)                |
| DEX (PO)                                                                                                                                                                                             | 6 mg/m <sup>2</sup>              | 1-7 (prephase)                |
| <b>According to randomization</b>                                                                                                                                                                    |                                  |                               |
| PRED (PO)                                                                                                                                                                                            | 60 mg/m <sup>2</sup>             | 8-28, tapered over 9 days     |
| DEX (PO)                                                                                                                                                                                             | 6 mg/m <sup>2</sup>              | 8-28, tapered over 9 days     |
| Vincristine (IV)                                                                                                                                                                                     | 1.5 mg/m <sup>2</sup> (max 2 mg) | 8,15,22,29                    |
| Daunorubicin (IV)                                                                                                                                                                                    | 30 mg/m <sup>2</sup>             | 8,15                          |
| Methotrexate (IT)                                                                                                                                                                                    |                                  | 12,25                         |
| Native <i>E.coli</i> ASNase                                                                                                                                                                          | 10,000 IU/m <sup>2</sup>         | 12,15,18,22,25,29,32,35       |
| <b>Consolidation: protocol IB</b>                                                                                                                                                                    |                                  |                               |
| Cytarabine (IV)                                                                                                                                                                                      | 75 mg/m <sup>2</sup>             | 38-41,45-48,52-55,59-62       |
| MTX chemotherapy (IT)                                                                                                                                                                                |                                  | 38,52                         |
| 6-mercaptopurine (PO)                                                                                                                                                                                | 60 mg/m <sup>2</sup>             | 36-63                         |
| <b>According to randomisation</b>                                                                                                                                                                    |                                  |                               |
| Short native <i>E.coli</i> ASNase                                                                                                                                                                    | No ASNase                        |                               |
| Long native <i>E.coli</i> ASNase                                                                                                                                                                     | 5,000 IU/m <sup>2</sup>          | 38,41,45,48,52,55,59,62       |
| <b>Interval therapy</b>                                                                                                                                                                              |                                  |                               |
| 6-mercaptopurine (PO)                                                                                                                                                                                | 25 mg/m <sup>2</sup>             | 1-56                          |
| Methotrexate (24 h) †                                                                                                                                                                                | 5,000 mg/m <sup>2</sup>          | 8,22,36,50                    |
| MTX chemotherapy (IT)                                                                                                                                                                                |                                  | 9,23,37,51                    |
| <b>Late intensif.: protocol II</b>                                                                                                                                                                   |                                  |                               |
| DEX (PO)                                                                                                                                                                                             | 6 mg/m <sup>2</sup>              | 1-21, taper over 9 days       |
| Vincristine (IV)                                                                                                                                                                                     | 1.5 mg/m <sup>2</sup> (max 2 mg) | 8,15,22,29                    |
| Doxorubicin (IV)                                                                                                                                                                                     | 30 mg/m <sup>2</sup>             | 8,15                          |
| Methotrexate (IT)                                                                                                                                                                                    |                                  | 38                            |
| Cytarabine (IV)                                                                                                                                                                                      | 75 mg/m <sup>2</sup>             | 38-41,45-48                   |
| 6-thioguanine (PO)                                                                                                                                                                                   | 60 mg/m <sup>2</sup>             | 36-49                         |
| <b>According to randomisation</b>                                                                                                                                                                    |                                  |                               |
| Short native <i>E.coli</i> ASNase                                                                                                                                                                    | 10,000 IU/m <sup>2</sup>         | 8,11,15,18                    |
| Long native <i>E.coli</i> ASNase                                                                                                                                                                     | 10,000 IU/m <sup>2</sup>         | 8,11,15,18                    |
| and                                                                                                                                                                                                  | 5,000 IU/m <sup>2</sup>          | 22,25,29,32                   |
| <b>Maintenance (74 weeks)</b>                                                                                                                                                                        |                                  |                               |
| 6-mercaptopurine (PO)                                                                                                                                                                                | 50 mg/m <sup>2</sup>             | Daily                         |
| Methotrexate (PO)                                                                                                                                                                                    | 20 mg/m <sup>2</sup>             | Weekly                        |
| IT indicates intrathecally; PO, orally; PRED, prednisolone; DEX, Dexamethasone; IV, intravenously; Methotrexate: For age less than 1 year: 6 mg, 1 year 8 mg, 2 years 10 mg, 3 years and more: 12 mg |                                  |                               |
| † Leucovorin rescue 12 mg/m <sup>2</sup> /6h starts at H36.                                                                                                                                          |                                  |                               |

**Suppl. table 1b: EORTC-CLG treatment protocol for average risk (AR1 and AR2) patients**

| <b>Drug</b>                              | <b>Dose</b>                      | <b>Days of administration</b> |
|------------------------------------------|----------------------------------|-------------------------------|
| <b>Induction: protocol IA</b>            |                                  |                               |
| Methotrexate (IT)                        |                                  | 1                             |
| <b>According to randomization</b>        |                                  |                               |
| PRED (PO)                                | 60 mg/m <sup>2</sup>             | 1-7 (prephase)                |
| DEX (PO)                                 | 6 mg/m <sup>2</sup>              | 1-7 (prephase)                |
| <b>According to randomization</b>        |                                  |                               |
| PRED (PO)                                | 60 mg/m <sup>2</sup>             | 8-28, tapered over 9 days     |
| DEX (PO)                                 | 6 mg/m <sup>2</sup>              | 8-28, tapered over 9 days     |
| <b>AR1</b>                               |                                  |                               |
| Vincristine (IV)                         | 1.5 mg/m <sup>2</sup> (max 2 mg) | 8,15,22,29                    |
| Daunorubicin (IV)                        | 30 mg/m <sup>2</sup>             | 8,15,22,29                    |
| Triple chemotherapy (IT)                 |                                  | 12,25                         |
| Native <i>E.coli</i> ASNase              | 10,000 IU/m <sup>2</sup>         | 12,15,18,22,25,29,32,35       |
| <b>AR2</b>                               |                                  |                               |
| Cyclophosphamide                         | 1,000 mg/m <sup>2</sup>          | 9                             |
| Methotrexate (24 h) †                    | 5 g/m <sup>2</sup>               | 8                             |
| Triple chemotherapy (IT)                 |                                  | 9,25                          |
| Vincristine (IV)                         | 1.5 mg/m <sup>2</sup> (max 2 mg) | 8,15,22,29                    |
| Daunorubicin (IV)                        | 40 mg/m <sup>2</sup>             | 15,22,29                      |
| Native <i>E.coli</i> ASNase              | 10,000 IU/m <sup>2</sup>         | 12,15,18,22,25,29,32,35       |
| <b>Consolidation: protocol IB</b>        |                                  |                               |
| Cyclophosphamide (IV)                    | 1,000 mg/m <sup>2</sup>          | 36,63                         |
| Cytarabine (IV)                          | 75 mg/m <sup>2</sup>             | 38-41,45-48,52-55,59-62       |
| Triple chemotherapy (IT)                 |                                  | 38,52                         |
| 6-mercaptopurine (PO)                    | 60 mg/m <sup>2</sup>             | 36-63                         |
| <b>According to randomisation</b>        |                                  |                               |
| Short native <i>E.coli</i> ASNase        | No ASNase                        |                               |
| Long native <i>E.coli</i> ASNase         | 5,000 IU/m <sup>2</sup>          | 38,41,45,48,52,55,59,62       |
| <b>Interval therapy</b>                  |                                  |                               |
| 6-mercaptopurine (PO)                    | 25 mg/m <sup>2</sup>             | 1-56                          |
| Methotrexate (24 h) †                    | 5,000 mg/m <sup>2</sup>          | 8,22,36,50                    |
| Triple chemotherapy (IT)                 |                                  | 9,23,37,51                    |
| <b>Late intensification: protocol II</b> |                                  |                               |
| DEX (PO)                                 | 6 mg/m <sup>2</sup>              | 1-21, taper over 9 days       |
| Vincristine (IV)                         | 1.5 mg/m <sup>2</sup> (max 2 mg) | 8,15,22,29                    |
| Doxorubicin (IV)                         | 30 mg/m <sup>2</sup>             | 8,15,22,29                    |
| Triple chemotherapy (IT)                 |                                  | 38                            |
| Cyclophosphamide (IV)                    | 1,000 mg/m <sup>2</sup>          | 36                            |
| Cytarabine (IV)                          | 75 mg/m <sup>2</sup>             | 38-41,45-48                   |
| 6-thioguanine (PO)                       | 60 mg/m <sup>2</sup>             | 36-49                         |

|                                                                                                                                                                                                                                                                                                                                                                                                                                                                                                                                                                 |                                  |                                                     |
|-----------------------------------------------------------------------------------------------------------------------------------------------------------------------------------------------------------------------------------------------------------------------------------------------------------------------------------------------------------------------------------------------------------------------------------------------------------------------------------------------------------------------------------------------------------------|----------------------------------|-----------------------------------------------------|
| <b>According to randomization</b>                                                                                                                                                                                                                                                                                                                                                                                                                                                                                                                               |                                  |                                                     |
| Short native <i>E.coli</i> ASNase                                                                                                                                                                                                                                                                                                                                                                                                                                                                                                                               | 10,000 IU/m <sup>2</sup>         | 8,11,15,18                                          |
| Long native <i>E.coli</i> ASNase                                                                                                                                                                                                                                                                                                                                                                                                                                                                                                                                | 10,000 IU/m <sup>2</sup>         | 8,11,15,18                                          |
| and                                                                                                                                                                                                                                                                                                                                                                                                                                                                                                                                                             | 5,000 IU/m <sup>2</sup>          | 22,25,29,32                                         |
| <b>Maintenance (74 weeks)</b>                                                                                                                                                                                                                                                                                                                                                                                                                                                                                                                                   |                                  |                                                     |
| <b>AR1</b>                                                                                                                                                                                                                                                                                                                                                                                                                                                                                                                                                      |                                  |                                                     |
| 6-mercaptopurine (PO)                                                                                                                                                                                                                                                                                                                                                                                                                                                                                                                                           | 50 mg/m <sup>2</sup>             | Daily                                               |
| Methotrexate (PO)                                                                                                                                                                                                                                                                                                                                                                                                                                                                                                                                               | 20 mg/m <sup>2</sup>             | Weekly                                              |
| Triple chemotherapy (IT)                                                                                                                                                                                                                                                                                                                                                                                                                                                                                                                                        |                                  | Every 70 days, starting D22, 6 times                |
| <b>According to randomisation</b>                                                                                                                                                                                                                                                                                                                                                                                                                                                                                                                               |                                  |                                                     |
| No pulses                                                                                                                                                                                                                                                                                                                                                                                                                                                                                                                                                       |                                  |                                                     |
| PRED (PO) ‡                                                                                                                                                                                                                                                                                                                                                                                                                                                                                                                                                     | 60 mg/m <sup>2</sup>             | Every 70 days, for 7 days, starting D57-63, 6 times |
| DEX (PO) ‡                                                                                                                                                                                                                                                                                                                                                                                                                                                                                                                                                      | 6 mg/m <sup>2</sup>              | Every 70 days, for 7 days, starting D57-63, 6 times |
| Vincristine                                                                                                                                                                                                                                                                                                                                                                                                                                                                                                                                                     | 1.5 mg/m <sup>2</sup> (max 2 mg) | Every 70 days, on D57 and D63, 6 times              |
| <b>AR2</b>                                                                                                                                                                                                                                                                                                                                                                                                                                                                                                                                                      |                                  |                                                     |
| 6-mercaptopurine (PO)                                                                                                                                                                                                                                                                                                                                                                                                                                                                                                                                           | 50 mg/m <sup>2</sup>             | Daily                                               |
| Methotrexate (PO)                                                                                                                                                                                                                                                                                                                                                                                                                                                                                                                                               | 20 mg/m <sup>2</sup>             | Weekly                                              |
| Methotrexate (24 h) †                                                                                                                                                                                                                                                                                                                                                                                                                                                                                                                                           | 5,000 mg/m <sup>2</sup>          | Every 70 days, starting D22, 6 times                |
| Triple chemotherapy (IT)                                                                                                                                                                                                                                                                                                                                                                                                                                                                                                                                        |                                  | Every 70 days, starting D23, 6 times                |
| Native <i>E.coli</i> ASNase                                                                                                                                                                                                                                                                                                                                                                                                                                                                                                                                     | 25,000 IU/m <sup>2</sup>         | Every 70 days, starting D23, 6 times                |
| <b>According to randomization</b>                                                                                                                                                                                                                                                                                                                                                                                                                                                                                                                               |                                  |                                                     |
| No pulses                                                                                                                                                                                                                                                                                                                                                                                                                                                                                                                                                       |                                  |                                                     |
| PRED (PO) ‡                                                                                                                                                                                                                                                                                                                                                                                                                                                                                                                                                     | 60 mg/m <sup>2</sup>             | Every 70 days, for 7 days, starting D57-63, 6 times |
| DEX (PO) ‡                                                                                                                                                                                                                                                                                                                                                                                                                                                                                                                                                      | 6 mg/m <sup>2</sup>              | Every 70 days, for 7 days, starting D57-63, 6 times |
| Vincristine (IV)                                                                                                                                                                                                                                                                                                                                                                                                                                                                                                                                                | 1.5 mg/m <sup>2</sup> (max 2 mg) | Every 70 days, on D57 and D63, 6 times              |
| <p>IT indicates intrathecally; PO, orally; PRED, prednisolone; DEX, Dexamethasone; IV, intravenously; D X, day X.</p> <p>Methotrexate: Less than 1 year: 6 mg, 1 year 8 mg, 2 years 10 mg, 3 years and more: 12 mg<br/> Cytarabine: Less than 1 year: 15 mg, 1 year 20 mg, 2 years 25 mg, 3 years and more: 30 mg<br/> Hydrocortisone: Less than 1 year: 7.5 mg, 1 year 10 mg, 2 years 12.5 mg, 3 years and more: 15 mg</p> <p>† Leucovorin rescue 12 mg/m<sup>2</sup>/6h starts at H36.<br/> ‡ Same corticosteroid as initial randomisation (protocol IA).</p> |                                  |                                                     |

**Suppl. figure 1: Treatment comparison for disease free survival (A) and overall survival (B) in B-cell ALL of the EORTC-CLG 58951 trial**

O, observed number of events; N, number of patients randomly assigned.

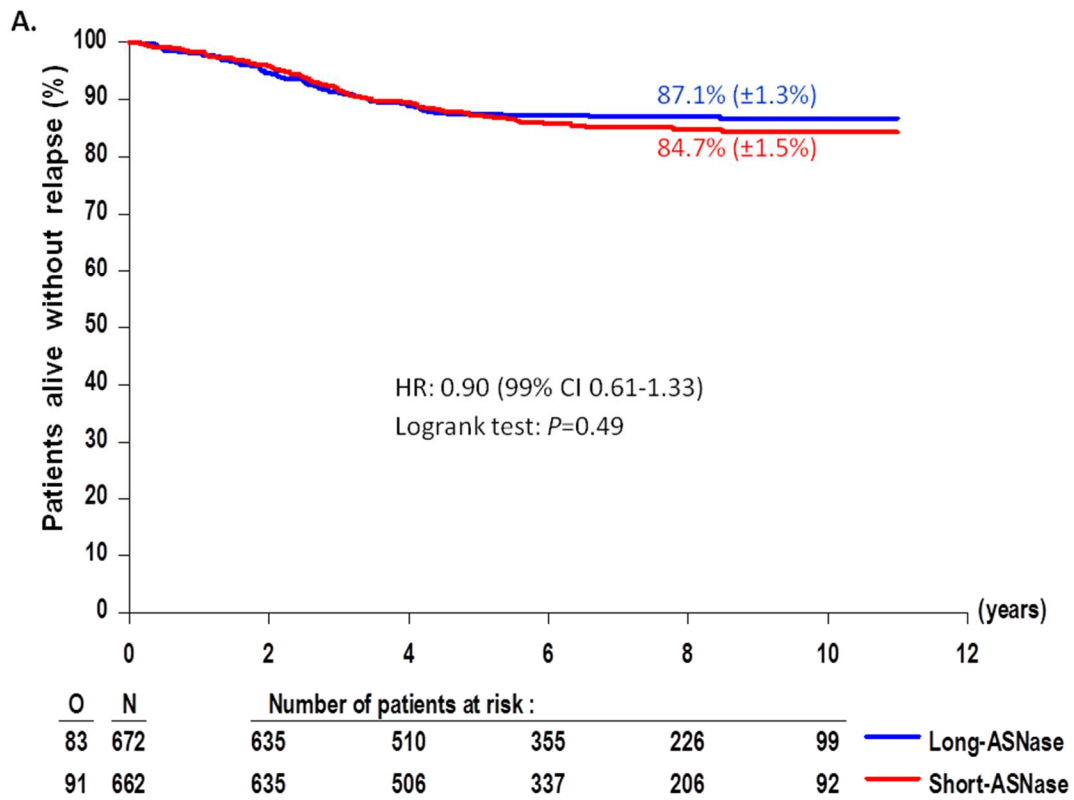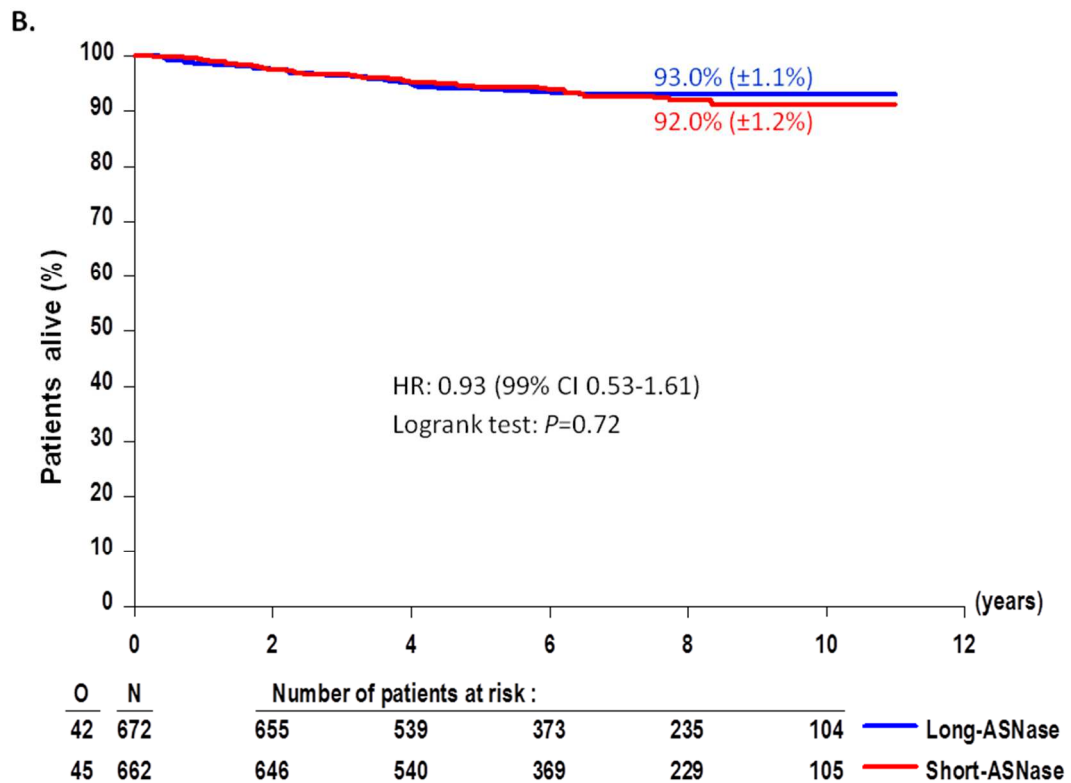

**Suppl. figure 2: Treatment comparison for disease free survival (A) and overall survival (B) in T-cell ALL of the EORTC-CLG 58951 trial**

O, observed number of events; N, number of patients randomly assigned.

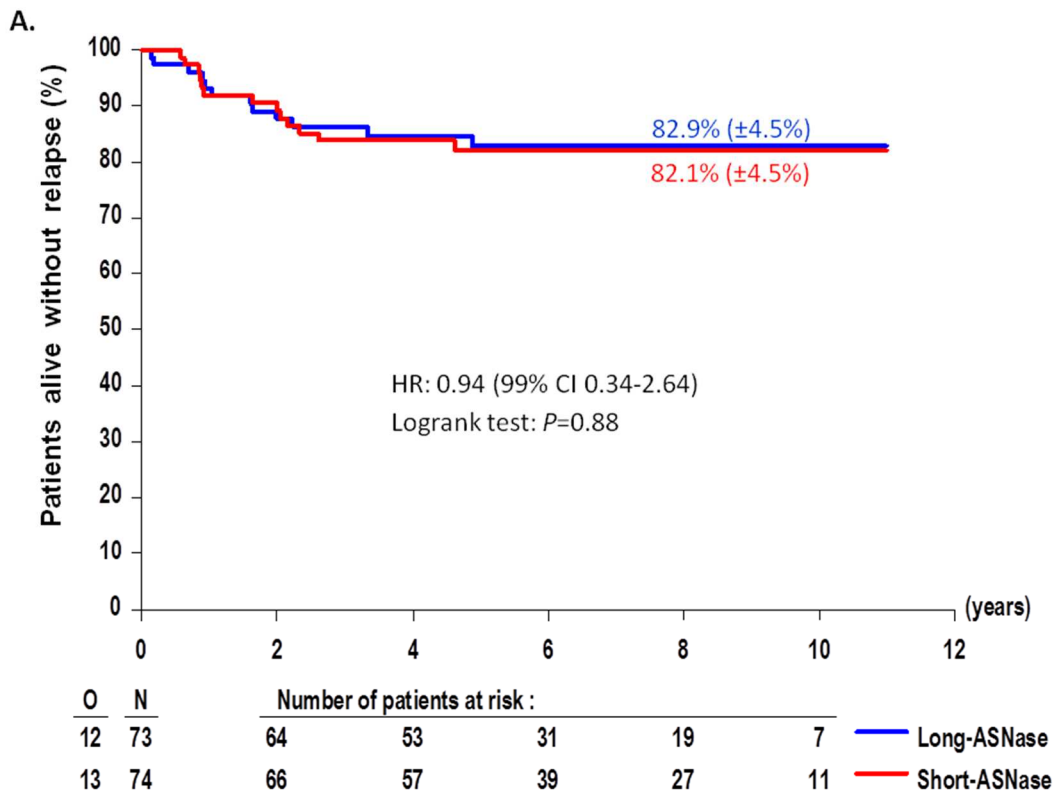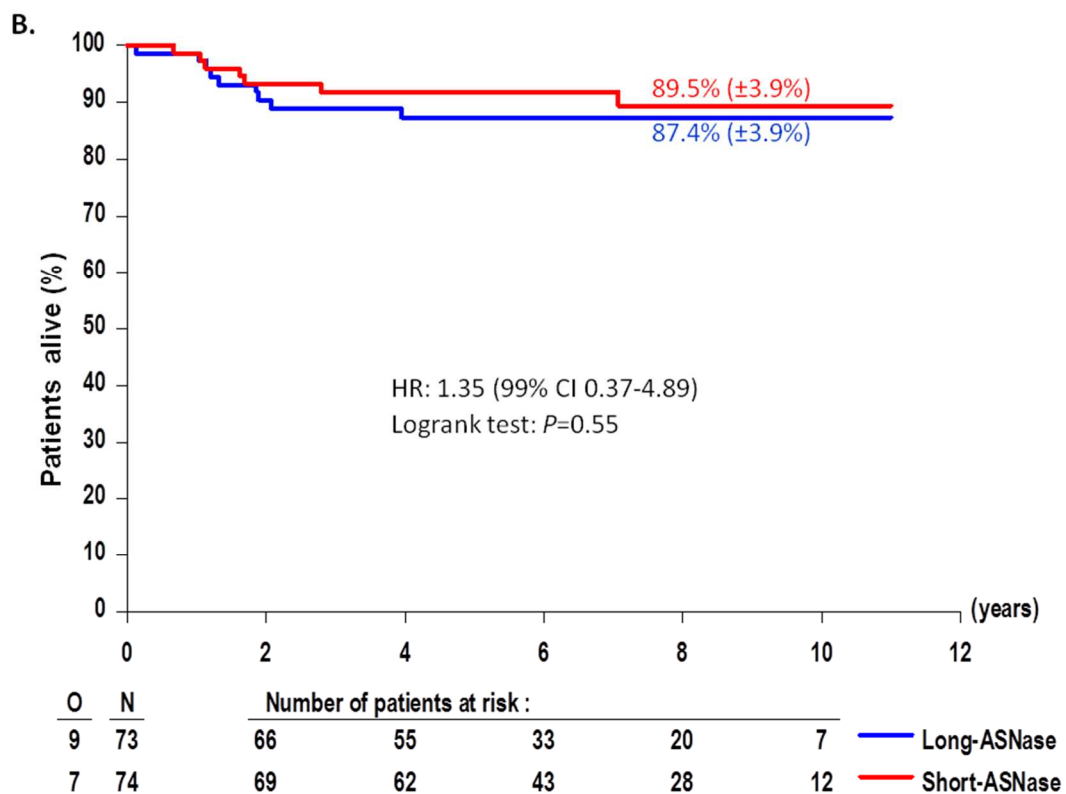

**Suppl. figure 3: Treatment comparison for disease free survival (A) and overall survival (B) in prednisolone group versus disease free survival (C) and overall survival (D) in the dexamethasone group of the EORTC-CLG 58951 trial**  
 O: observed number of events; N, number of patients randomly assigned.

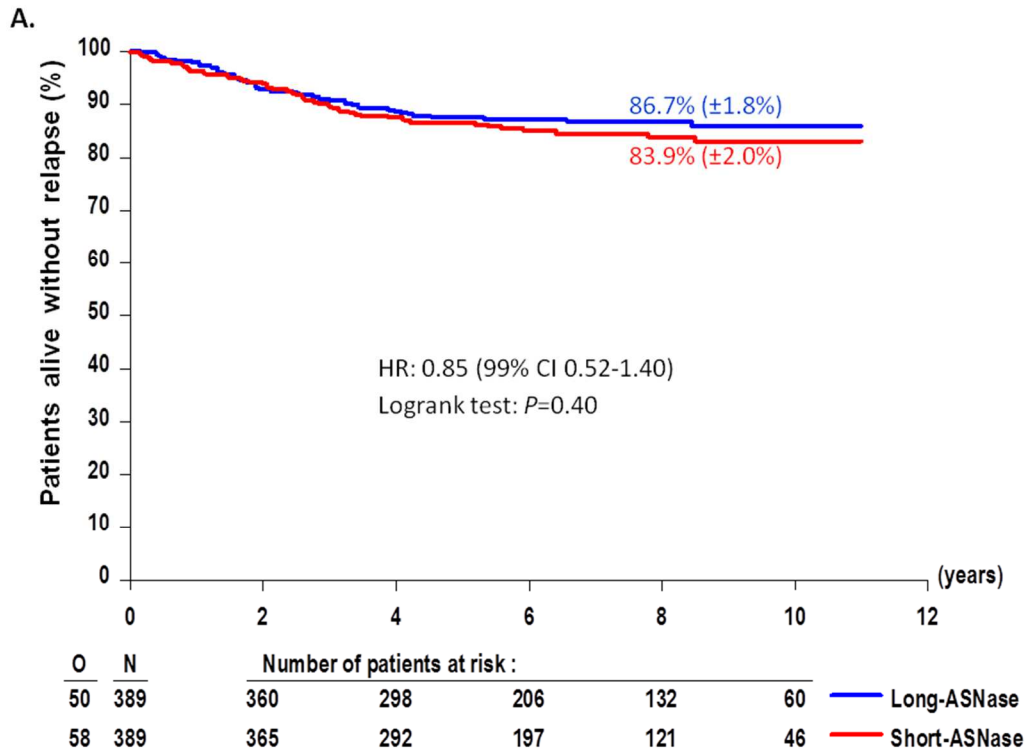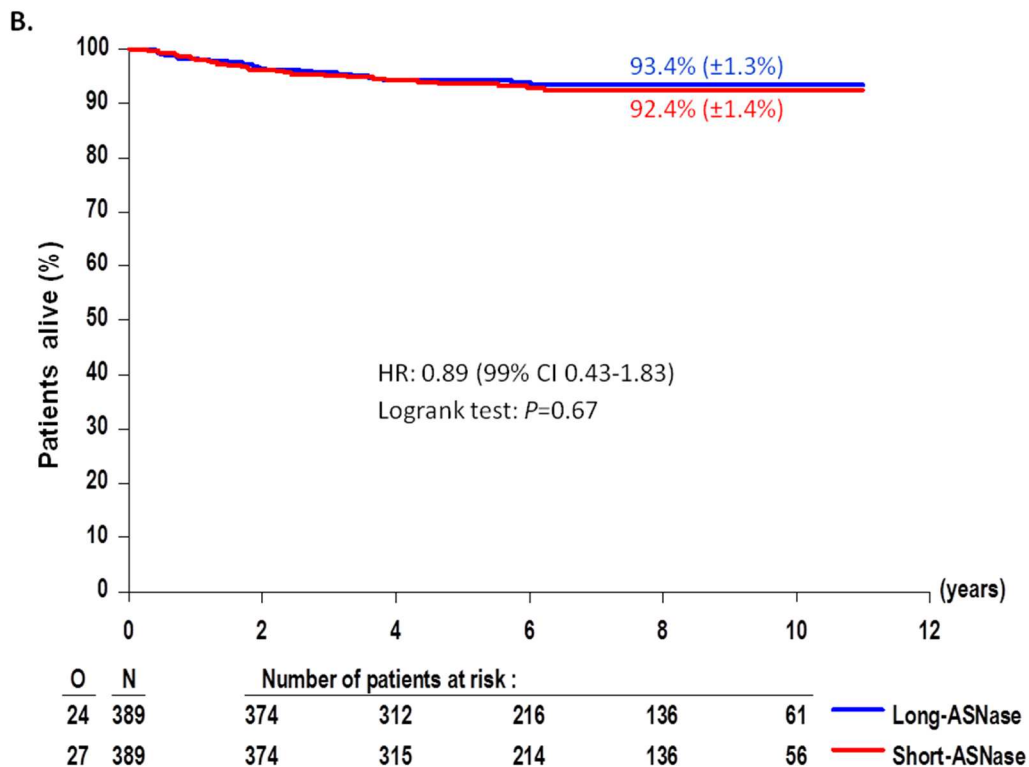

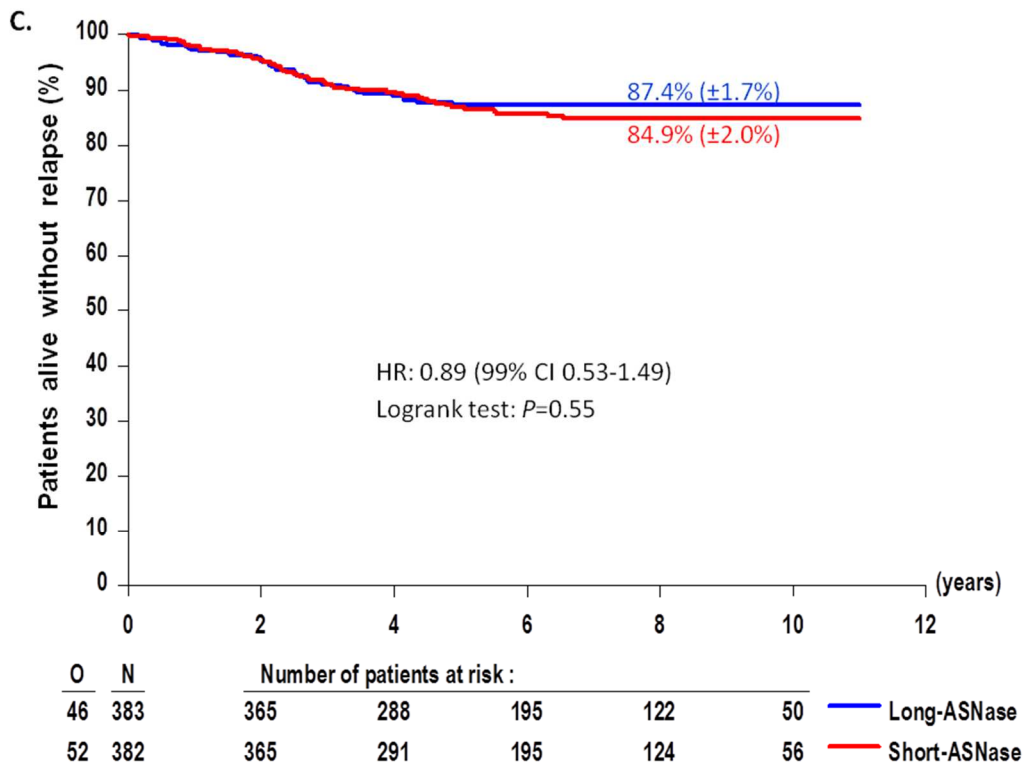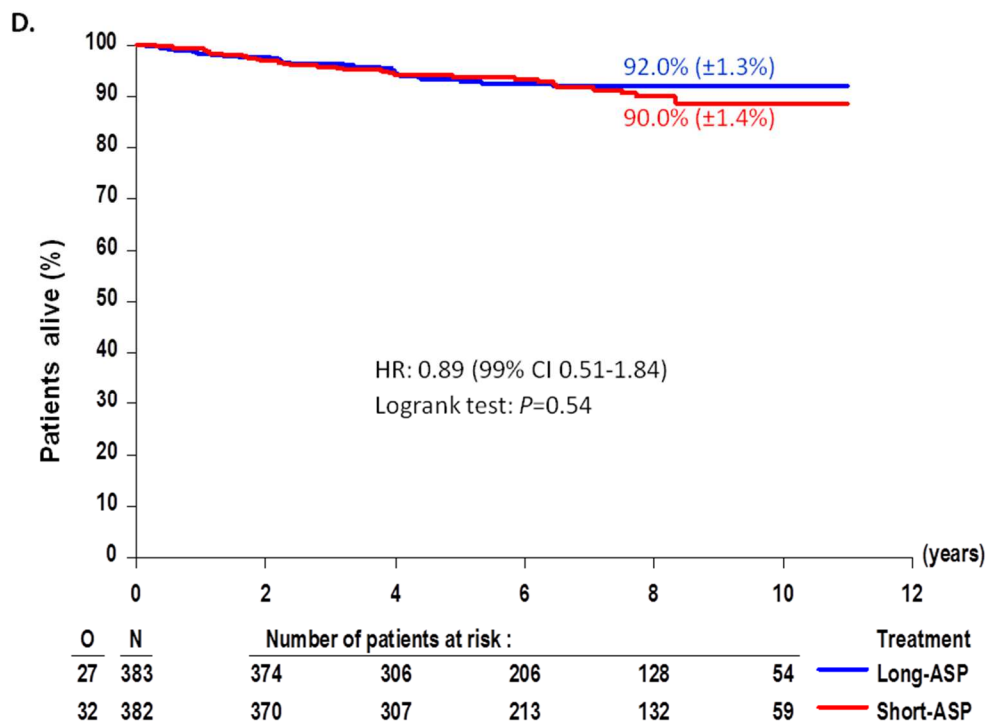

**Suppl. figure 4: Treatment comparison for disease free survival (A) and overall survival (B) in ALL with NCI Standard Risk and disease free survival (C) and overall survival (D) in ALL with NCI High Risk**

NCI Standard Risk indicates ALL with  $WBC < 50 \times 10^9/l$  and age 1 - <10 years, NCI High Risk: ALL with  $WBC \geq 50 \times 10^9/l$  or age < 1 or  $\geq 10$  years.

O, observed number of events; N, number of patients randomly assigned.

A.

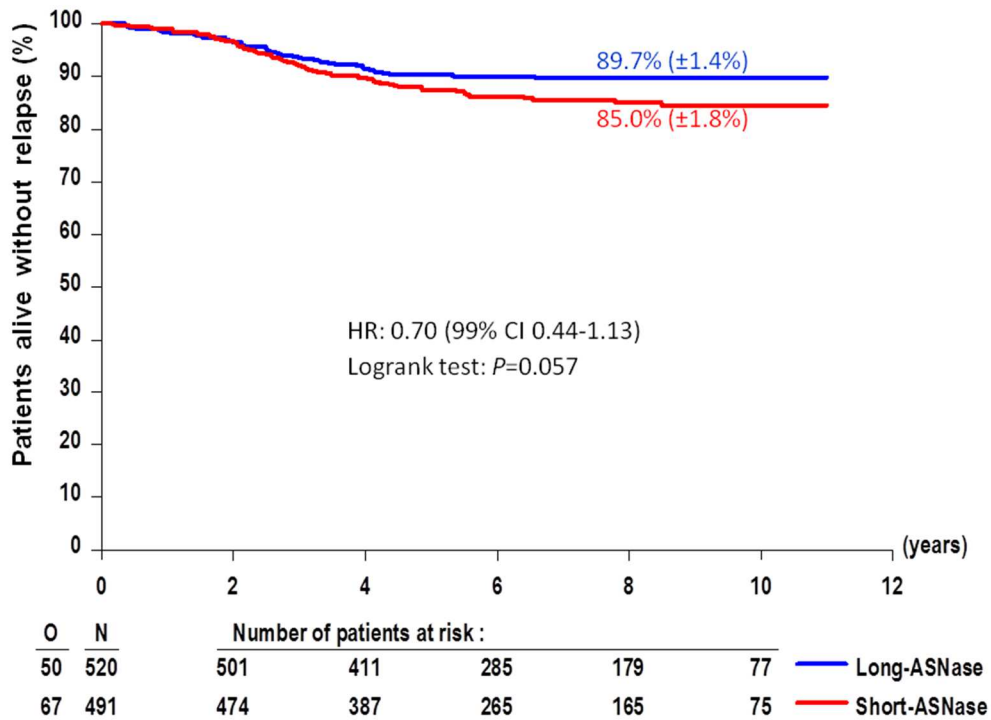

B.

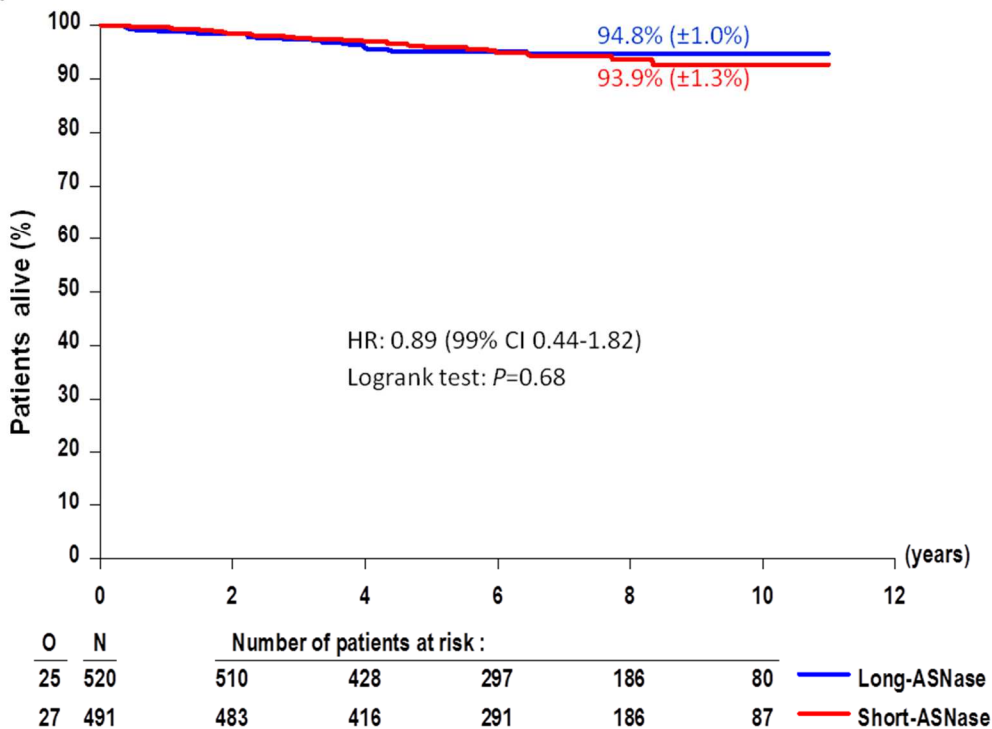



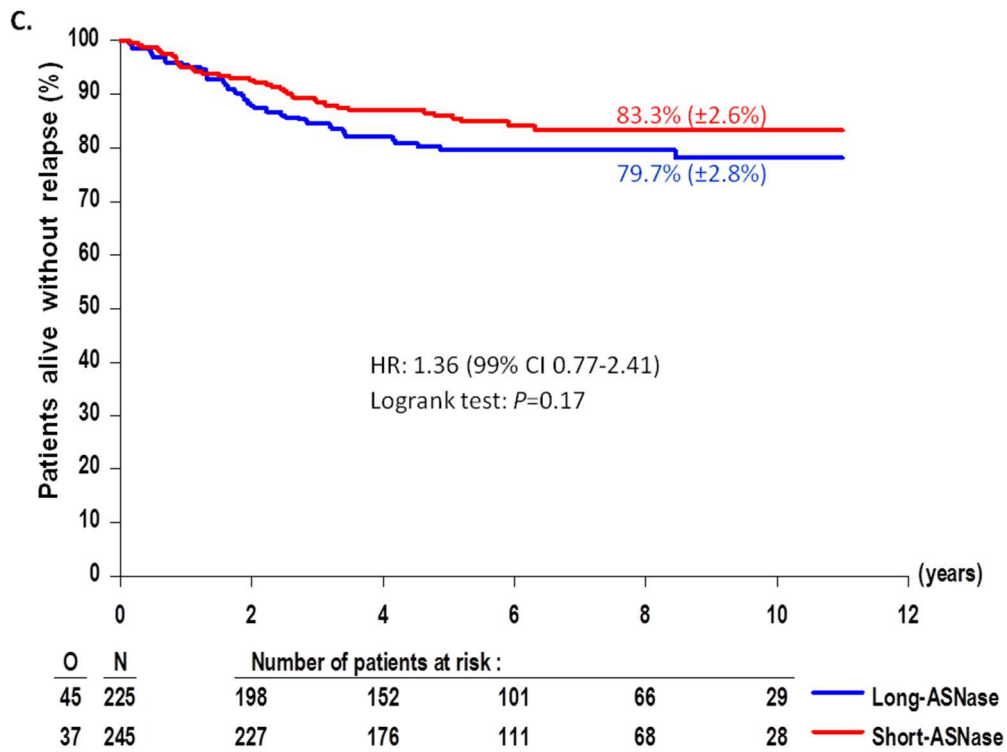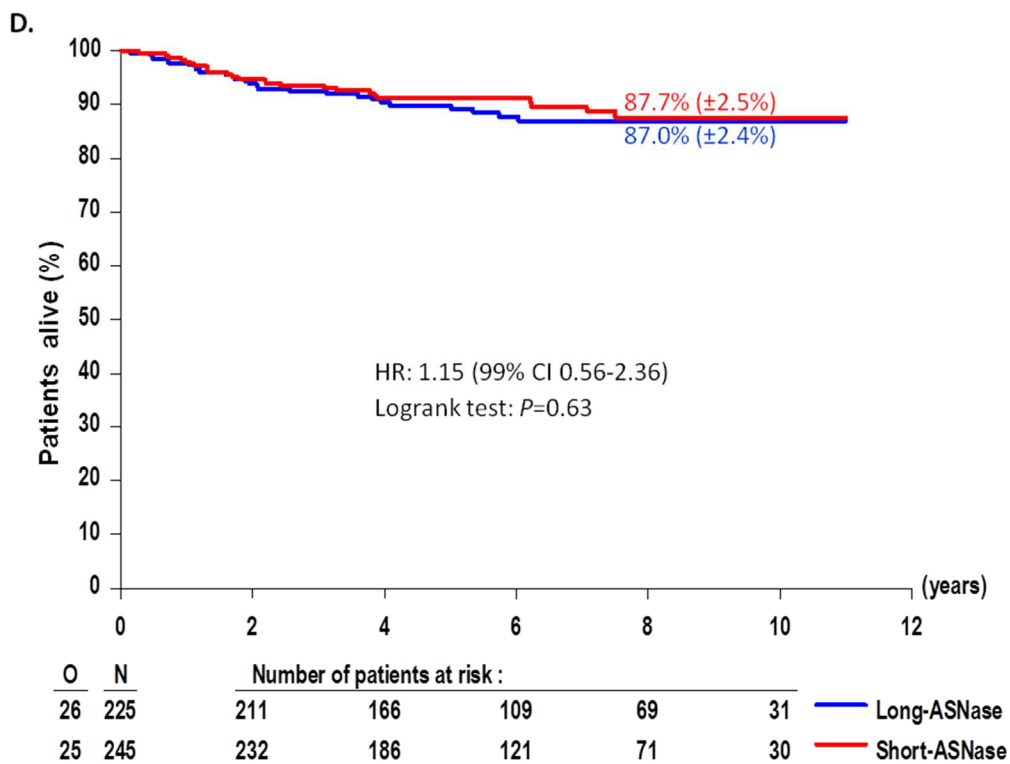

Supplement: 2017.165845.MONDELAERS_SUPPL.pdf [file 2017.165845.MONDELAERS_SUPPL.pdf]
